# Supplementary material for: Comparison of Twenty Selected Fenugreek Genotypes Grown under Irrigated and Dryland Conditions: Morphology, Yield, Quality Properties and Antioxidant Activities
Source: MDPI journal article supplement (doi:10.3390/agronomy14040713), 2024-03-29
Supplement: s1 [file s1]

**Table S1.** The distance among the fenugreek genotypes based on the examined properties

| Number of Clusters | Distance | Leader    | Joiner    |
|--------------------|----------|-----------|-----------|
| 1                  | 9.41     | Çiftçi    | PI 194020 |
| 2                  | 8.20     | PI 194020 | PI 215615 |
| 3                  | 8.10     | Çiftçi    | PI 251640 |
| 4                  | 6.63     | Çiftçi    | Gürarlan  |
| 5                  | 6.37     | Gürarlan  | PI 302448 |
| 6                  | 6.31     | PI 251640 | PI 613633 |
| 7                  | 6.13     | Çiftçi    | PI 381062 |
| 8                  | 5.87     | PI 251640 | PI 286532 |
| 9                  | 5.70     | PI 194020 | PI 426971 |
| 10                 | 5.68     | PI 215615 | PI 617076 |
| 11                 | 5.66     | Çiftçi    | PI 469264 |
| 12                 | 5.44     | PI 194020 | PI 302449 |
| 13                 | 4.84     | PI 381062 | PI 568215 |
| 14                 | 4.81     | PI 194020 | PI 426973 |
| 15                 | 4.73     | PI 302448 | PI 639185 |
| 16                 | 4.62     | PI 302448 | PI 572538 |
| 17                 | 4.25     | PI 286532 | PI 296394 |
| 18                 | 4.04     | Çiftçi    | PI 173820 |
| 19                 | 3.91     | PI 286532 | PI 660995 |

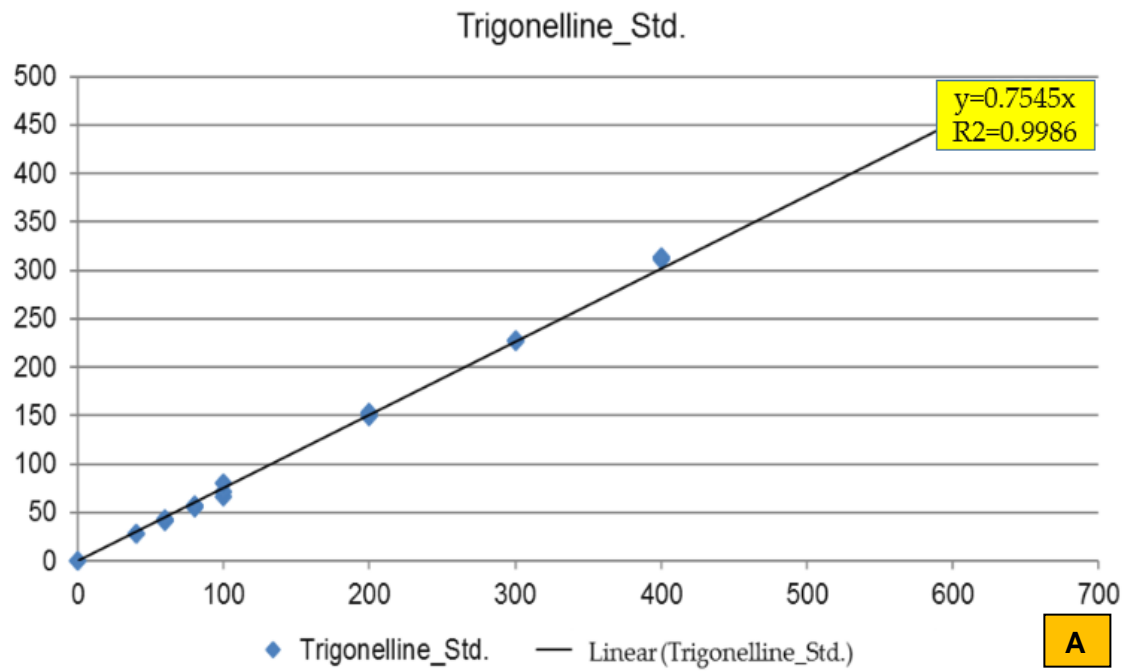

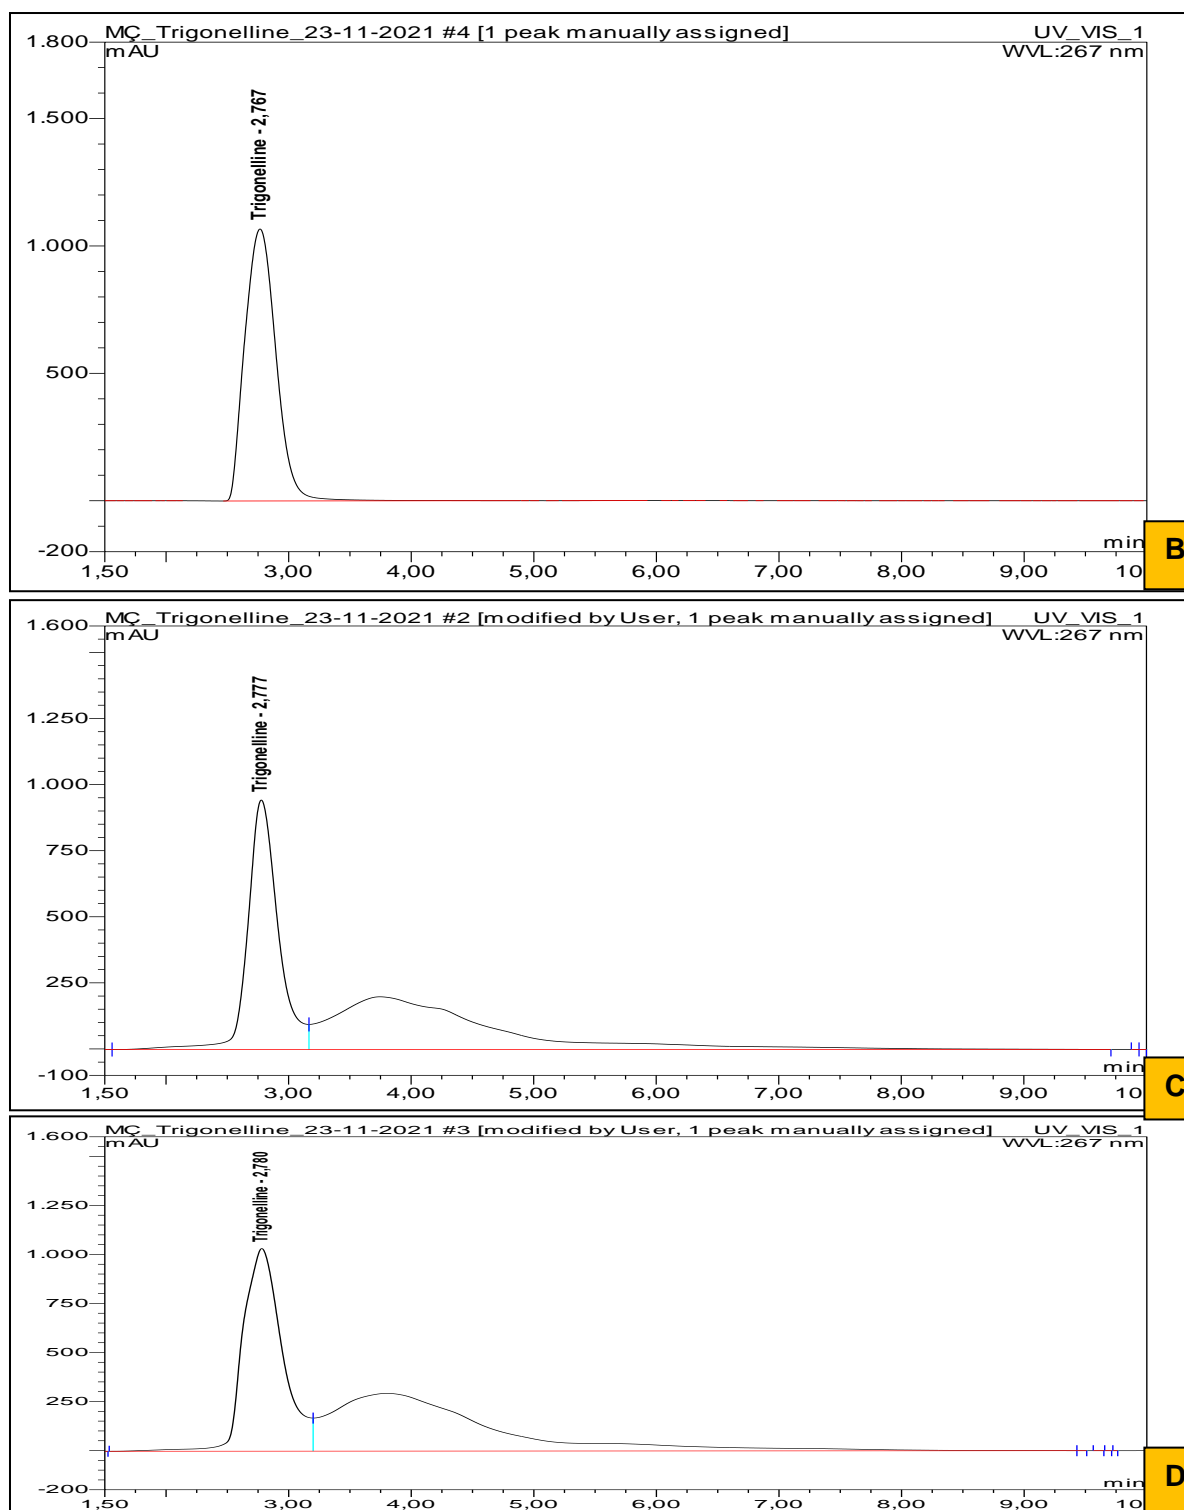

**Figure S1.** Calibration chart (A) and standard chromatogram (B) of the trigonelline standard and sample trigonelline amount (C: PI 469264 genotype under dryland conditions, D: Çiftçi cultivar under irrigated conditions).
